# Supplementary material
Source: PubMed Central journal article supplement (PMC3173561)
Supplement: NIHMS319708-supplement-3.pdf [file NIHMS319708-supplement-3.pdf]

## LIST OF SUPPLEMENTAL DIGITAL CONTENT

**Supplemental Digital Content 1.doc:** Patient demographics by study cohort.

**Supplemental Digital Content 2.ppt:** Scatter plots of meropenem weight-adjusted clearance and half-life versus PMA
